# Supplementary material for: Population structure and history of the Welsh sheep breeds determined by whole genome genotyping
Source: PubMed Central journal article supplement (PMC4474581; doi:10.1186/s12863-015-0216-x), 2015-06-20

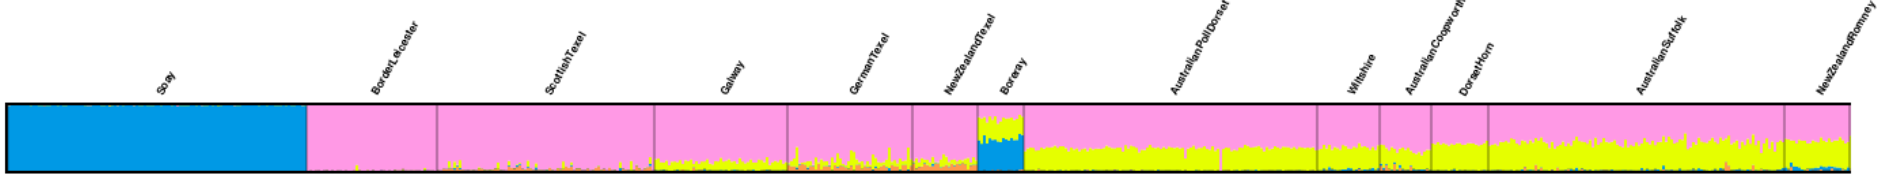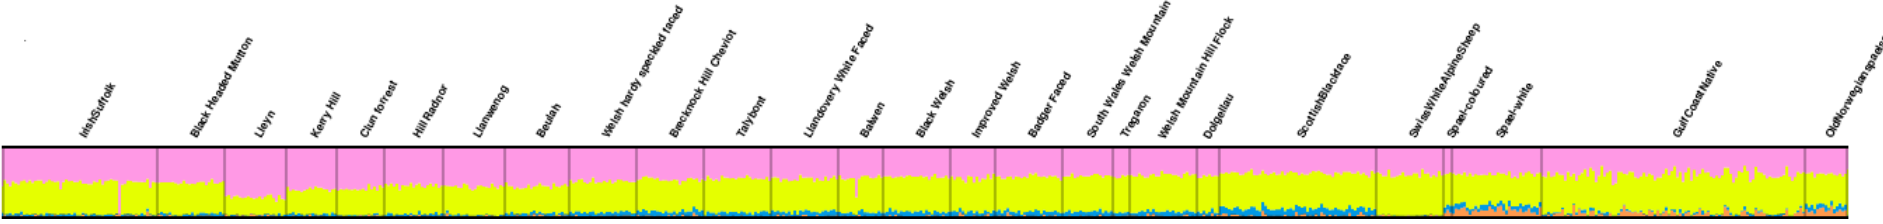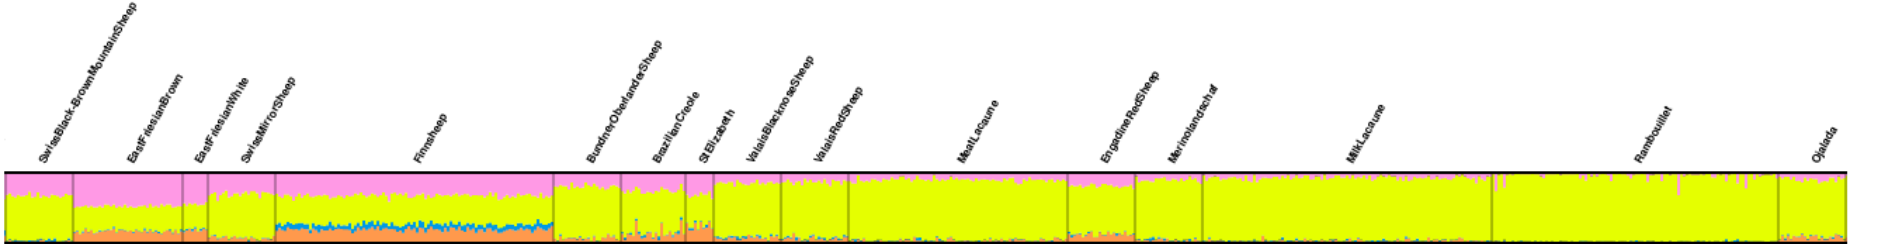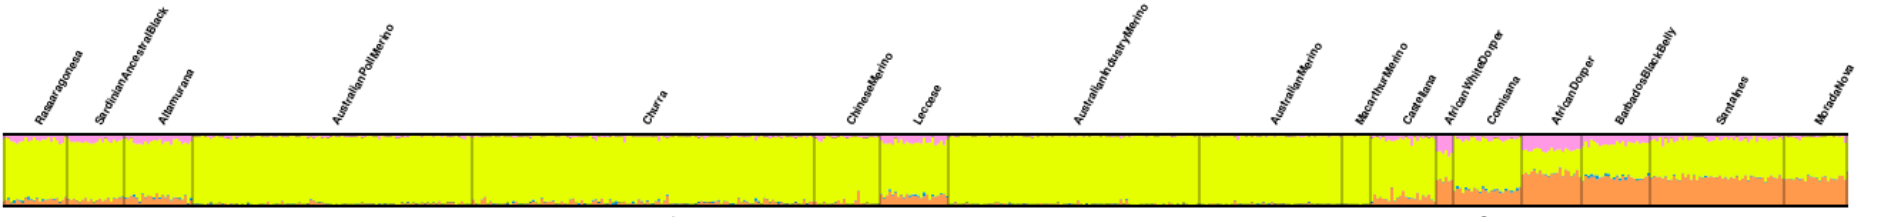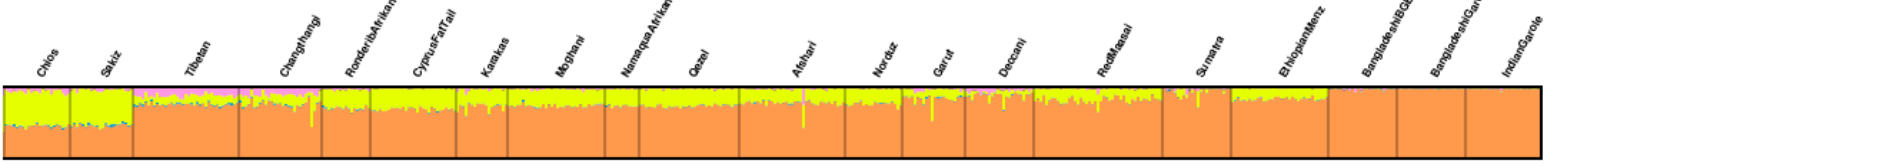

Supplement: 12863_2015_216_MOESM4_ESM.pdf [file 12863_2015_216_MOESM4_ESM.pdf]
