# Supplementary material for: Population structure and history of the Welsh sheep breeds determined by whole genome genotyping
Source: PubMed Central journal article supplement (PMC4474581; doi:10.1186/s12863-015-0216-x), 2015-06-20
Supplement: 12863_2015_216_MOESM7_ESM.pdf [file 12863_2015_216_MOESM7_ESM.pdf]

**Supplementary Table 1. Haplotype sharing between the 18 Welsh and 10 top worldwide breeds summarised by geographical origin.**

|                            | European breeds |                            |       |        |                |        |       | USA | Iranian | New Zealand/<br>Australian |
|----------------------------|-----------------|----------------------------|-------|--------|----------------|--------|-------|-----|---------|----------------------------|
|                            | Scandinavian    | Spanish/Portuguese/Italian | Irish | French | UK (non-Welsh) | German | Swiss |     |         |                            |
| Beulah                     |                 |                            | +     |        | +              |        |       | +   |         | +                          |
| Kerry Hill                 |                 | +                          | +     |        |                |        |       |     |         | +                          |
| Black Welsh Mountain       | +               |                            | +     | +      | +              |        |       |     |         |                            |
| Clun Forest                |                 |                            |       | +      | +              |        |       | +   |         | +                          |
| Llanwenog                  |                 | +                          |       |        | +              | +      |       | +   |         | +                          |
| Badger Faced               |                 |                            | +     |        |                |        |       | +   |         | +                          |
| Hardy Speckled<br>Faced    |                 | +                          |       | +      | +              | +      |       | +   |         | +                          |
| Improved Welsh Mountain    | +               | +                          |       |        | +              | +      |       | +   |         | +                          |
| Balwen                     |                 | +                          |       |        | +              |        |       | +   |         | +                          |
| Hill Flock Welsh Mountain  | +               | +                          |       | +      |                |        |       |     |         | +                          |
| Dolgellau Welsh Mountain   |                 | +                          |       | +      |                |        |       | +   |         | +                          |
| Llandoverly White Faced    |                 | +                          |       |        | +              |        |       | +   |         | +                          |
| Tregaron Welsh Mountain    | +               |                            |       | +      |                |        |       | +   | +       |                            |
| Talybont Welsh Mountain    |                 | +                          |       | +      |                | +      |       | +   |         | +                          |
| Hill Radnor                |                 | +                          | +     |        | +              |        |       | +   |         | +                          |
| Brecknock Hill Cheviot     | +               |                            |       |        | +              | +      |       | +   |         | +                          |
| South Wales Welsh Mountain |                 |                            |       | +      | +              |        |       |     |         | +                          |
| Lleyn                      |                 |                            | +     |        | +              | +      |       | +   |         | +                          |

The International Sheep Genome Consortium (ISCG) breeds with the highest levels of haplotype sharing (top 10) with each of the Welsh breeds are summarised by geographical origin, based on 0-10Kb resolution.
