# Supplementary material for: Population structure and history of the Welsh sheep breeds determined by whole genome genotyping
Source: PubMed Central journal article supplement (PMC4474581; doi:10.1186/s12863-015-0216-x), 2015-06-20

Black Welsh  
 Talybont Welsh Mountain  
 South Wales  
 Welsh Mountain  
 Llandovery White Faced  
 Improved Welsh Mountain  
 Brecknock Hill Cheviot  
 Tregaron Welsh Mountain  
 Welsh Mountain  
 Hill Flock  
 Badger Faced  
 Dolgellau Welsh Mountain  
 Hill Radnor  
 Llwyn  
 Llanwenog  
 Clun Forrest  
 Balwen  
 Welsh Hardy  
 Speckled Faced  
 Beulah  
 Kerry Hill

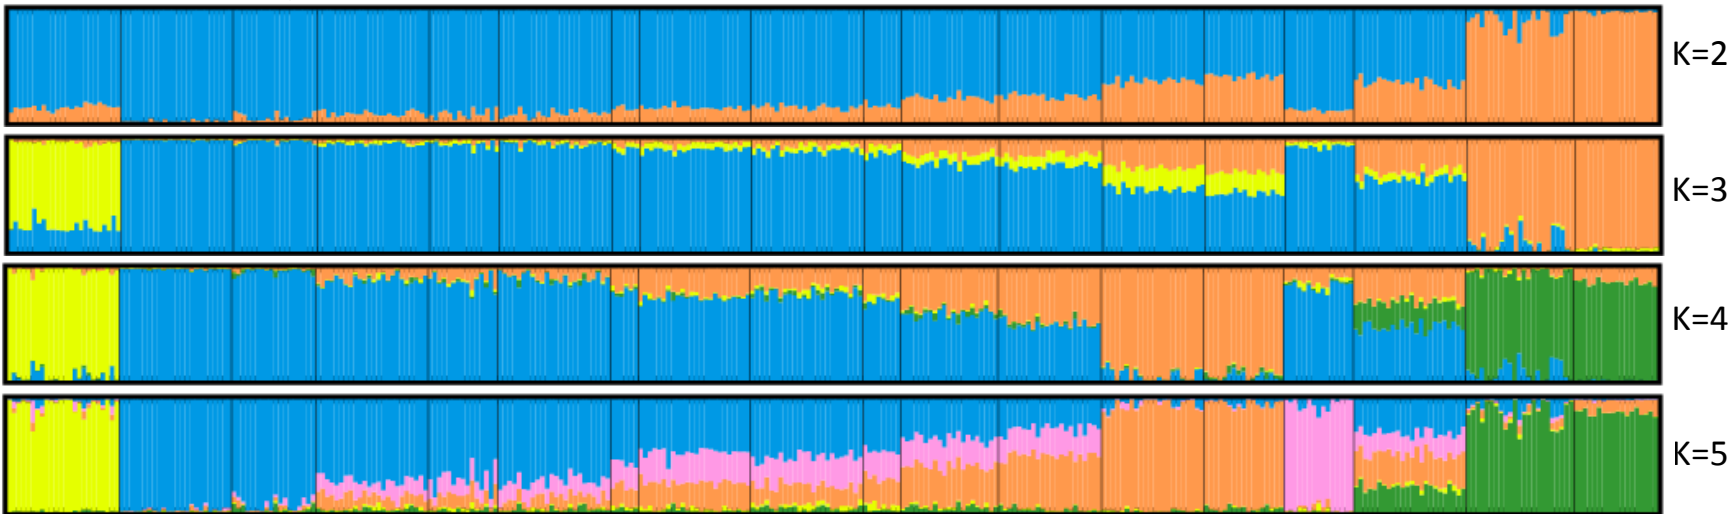

Supplement: 12863_2015_216_MOESM8_ESM.pdf [file 12863_2015_216_MOESM8_ESM.pdf]
