# Supplementary material for: Population structure and history of the Welsh sheep breeds determined by whole genome genotyping
Source: PubMed Central journal article supplement (PMC4474581; doi:10.1186/s12863-015-0216-x), 2015-06-20
Supplement: 12863_2015_216_MOESM9_ESM.pdf [file 12863_2015_216_MOESM9_ESM.pdf]

**Supplementary Table 2. Pairwise genetic differentiation ( $F_{ST}$ ) between Welsh, British and Asian breeds, Scottish Texel and Indian Garole.**

|    |                            | 1     | 2     | 3     | 4     | 5     | 6     | 7     | 8     | 9     | 10    | 11    | 12    | 13    | 14    | 15    | 16    | 17    | 18    | 19    | 20    |
|----|----------------------------|-------|-------|-------|-------|-------|-------|-------|-------|-------|-------|-------|-------|-------|-------|-------|-------|-------|-------|-------|-------|
| 1  | Lleyn                      | 0     | 0.078 | 0.082 | 0.144 | 0.072 | 0.130 | 0.141 | 0.097 | 0.088 | 0.130 | 0.080 | 0.072 | 0.109 | 0.123 | 0.108 | 0.085 | 0.159 | 0.126 | 0.202 | 0.099 |
| 2  | Badger Faced               | 0.078 | 0     | 0.051 | 0.106 | 0.030 | 0.091 | 0.112 | 0.057 | 0.047 | 0.110 | 0.040 | 0.031 | 0.068 | 0.099 | 0.078 | 0.045 | 0.137 | 0.084 | 0.170 | 0.105 |
| 3  | Welsh Hardy Speckled       | 0.082 | 0.051 | 0     | 0.118 | 0.047 | 0.108 | 0.102 | 0.068 | 0.057 | 0.106 | 0.056 | 0.043 | 0.084 | 0.097 | 0.084 | 0.060 | 0.113 | 0.098 | 0.177 | 0.108 |
| 4  | Black Welsh Mountain       | 0.144 | 0.106 | 0.118 | 0     | 0.104 | 0.162 | 0.177 | 0.126 | 0.117 | 0.174 | 0.113 | 0.102 | 0.140 | 0.163 | 0.146 | 0.118 | 0.201 | 0.155 | 0.234 | 0.171 |
| 5  | Improved Welsh Mountain    | 0.072 | 0.030 | 0.047 | 0.104 | 0     | 0.085 | 0.109 | 0.054 | 0.044 | 0.104 | 0.020 | 0.022 | 0.036 | 0.095 | 0.074 | 0.026 | 0.132 | 0.074 | 0.168 | 0.100 |
| 6  | Balwen                     | 0.130 | 0.091 | 0.108 | 0.162 | 0.085 | 0     | 0.170 | 0.116 | 0.105 | 0.168 | 0.104 | 0.090 | 0.133 | 0.155 | 0.137 | 0.108 | 0.193 | 0.146 | 0.223 | 0.161 |
| 7  | Beulah                     | 0.141 | 0.112 | 0.102 | 0.177 | 0.109 | 0.170 | 0     | 0.131 | 0.119 | 0.163 | 0.117 | 0.105 | 0.146 | 0.156 | 0.144 | 0.121 | 0.130 | 0.159 | 0.237 | 0.168 |
| 8  | Hill Flock Welsh Mountain  | 0.097 | 0.057 | 0.068 | 0.126 | 0.054 | 0.116 | 0.131 | 0     | 0.039 | 0.127 | 0.065 | 0.040 | 0.091 | 0.116 | 0.096 | 0.070 | 0.155 | 0.103 | 0.186 | 0.125 |
| 9  | Dolgellau Welsh Mountain   | 0.088 | 0.047 | 0.057 | 0.117 | 0.044 | 0.105 | 0.119 | 0.039 | 0     | 0.118 | 0.054 | 0.025 | 0.081 | 0.105 | 0.086 | 0.061 | 0.144 | 0.094 | 0.176 | 0.114 |
| 10 | Clun Forest                | 0.130 | 0.110 | 0.106 | 0.174 | 0.104 | 0.168 | 0.163 | 0.127 | 0.118 | 0     | 0.113 | 0.102 | 0.141 | 0.129 | 0.135 | 0.116 | 0.176 | 0.155 | 0.232 | 0.157 |
| 11 | Llandovery White Faced     | 0.080 | 0.040 | 0.056 | 0.113 | 0.020 | 0.104 | 0.117 | 0.065 | 0.054 | 0.113 | 0     | 0.027 | 0.055 | 0.102 | 0.082 | 0.023 | 0.139 | 0.082 | 0.174 | 0.108 |
| 12 | Tregaron Welsh Mountain    | 0.072 | 0.031 | 0.043 | 0.102 | 0.022 | 0.090 | 0.105 | 0.040 | 0.025 | 0.102 | 0.027 | 0     | 0.057 | 0.092 | 0.071 | 0.034 | 0.129 | 0.074 | 0.160 | 0.099 |
| 13 | Talybont Welsh Mountain    | 0.109 | 0.068 | 0.084 | 0.140 | 0.036 | 0.133 | 0.146 | 0.091 | 0.081 | 0.141 | 0.055 | 0.057 | 0     | 0.131 | 0.111 | 0.061 | 0.170 | 0.086 | 0.203 | 0.137 |
| 14 | Llanwenog                  | 0.123 | 0.099 | 0.097 | 0.163 | 0.095 | 0.155 | 0.156 | 0.116 | 0.105 | 0.129 | 0.102 | 0.092 | 0.131 | 0     | 0.126 | 0.106 | 0.171 | 0.145 | 0.221 | 0.149 |
| 15 | Hill Radnor                | 0.108 | 0.078 | 0.084 | 0.146 | 0.074 | 0.137 | 0.144 | 0.096 | 0.086 | 0.135 | 0.082 | 0.071 | 0.111 | 0.126 | 0     | 0.087 | 0.163 | 0.127 | 0.205 | 0.135 |
| 16 | Brecknock Hill Cheviot     | 0.085 | 0.045 | 0.060 | 0.118 | 0.026 | 0.108 | 0.121 | 0.070 | 0.061 | 0.116 | 0.023 | 0.034 | 0.061 | 0.106 | 0.087 | 0     | 0.144 | 0.094 | 0.180 | 0.113 |
| 17 | Kerry Hill                 | 0.159 | 0.137 | 0.113 | 0.201 | 0.132 | 0.193 | 0.130 | 0.155 | 0.144 | 0.176 | 0.139 | 0.129 | 0.170 | 0.171 | 0.163 | 0.144 | 0     | 0.184 | 0.257 | 0.186 |
| 18 | South Wales Welsh Mountain | 0.126 | 0.084 | 0.098 | 0.155 | 0.074 | 0.146 | 0.159 | 0.103 | 0.094 | 0.155 | 0.082 | 0.074 | 0.086 | 0.145 | 0.127 | 0.094 | 0.184 | 0     | 0.215 | 0.154 |
| 19 | Indian Garole              | 0.202 | 0.170 | 0.177 | 0.234 | 0.168 | 0.223 | 0.237 | 0.186 | 0.176 | 0.232 | 0.174 | 0.160 | 0.203 | 0.221 | 0.205 | 0.180 | 0.257 | 0.215 | 0     | 0.223 |
| 20 | Scottish Texel             | 0.099 | 0.105 | 0.108 | 0.171 | 0.100 | 0.161 | 0.168 | 0.125 | 0.114 | 0.157 | 0.108 | 0.099 | 0.137 | 0.149 | 0.135 | 0.113 | 0.186 | 0.154 | 0.223 | 0     |

<sup>a</sup> Scottish Texel and Indian Garole breeds were included in this table to demonstrate  $F_{ST}$  ranges with non-Welsh European and Asian breeds.
