# Supplementary material for: Population structure and history of the Welsh sheep breeds determined by whole genome genotyping
Source: PubMed Central journal article supplement (PMC4474581; doi:10.1186/s12863-015-0216-x), 2015-06-20
Supplement: 12863_2015_216_MOESM11_ESM.pdf [file 12863_2015_216_MOESM11_ESM.pdf]

**Supplementary Table 3. Summary statistics for the whole genome sequence of three Welsh sheep after strict quality control.**

| <b>Animal ID</b>         | <b>Uniquely aligned (Mb)</b> | <b>Heterozygous false negative error rate<sup>a</sup></b> | <b>Heterozygous false positive error rate</b> | <b>Mean read depth</b> | <b>Estimated true heterozygosity<sup>b</sup></b> |
|--------------------------|------------------------------|-----------------------------------------------------------|-----------------------------------------------|------------------------|--------------------------------------------------|
| <b>DWM1<sup>c</sup></b>  | 30,767                       | 0.422                                                     | $4.95 \times 10^{-5}$                         | 12                     | 0.002773                                         |
| <b>TWM1<sup>d</sup></b>  | 27,245                       | 0.533                                                     | $4.50 \times 10^{-5}$                         | 11                     | 0.002836                                         |
| <b>WHSF1<sup>e</sup></b> | 32,368                       | 0.364                                                     | $6.24 \times 10^{-5}$                         | 13                     | 0.002816                                         |

<sup>a</sup> Calculated as the proportion of heterozygous sites that are missed in the sequence data.

<sup>b</sup> True heterozygosity estimated from the observed heterozygosity and corrected for false negative error rate: True heterozygosity = observed heterozygosity/[1-False Negative Error Rate]).

<sup>c</sup> Dolgellau Welsh Mountain, <sup>d</sup> Tregaron Welsh Mountain, <sup>e</sup> Welsh Hardy Speckled Faced
